# Supplementary material for: Software- and TDM-Guided Dosing of Meropenem Promises High Rates of Target Attainment in Critically Ill Patients
Source: MDPI journal article supplement (doi:10.3390/antibiotics12071112), 2023-06-27
Supplement: s1 [file s1]

## Supplementary Materials:

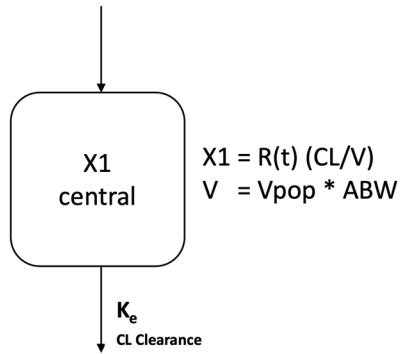

**Figure S1.** Pharmacokinetic model for concentration simulation. X1 describes the quantity of the drug in the central compartment, CL in L/h is the clearance of the drug from the central compartment and V in L is the volume of the central compartment, whereas V was calculated using population estimates from published literature [44] and the actual body weight (ABW).

**Table S1.** Distribution of pathogens.

| Pathogens                                                            | N (%)    |
|----------------------------------------------------------------------|----------|
| <i>Escherichia coli</i> , <i>Proteus</i> spp, <i>Klebsiella</i> spp  | 17 (19%) |
| <i>ESBL Escherichia coli</i>                                         | 5 (6%)   |
| <i>Enterobacter</i> spp, <i>Citrobacter</i> spp, <i>Serratia</i> spp | 9 (10%)  |
| <i>Pseudomonas aeruginosa</i> , <i>Acinetobacter</i> spp             | 8 (9%)   |
| MSSA                                                                 | 10 (11%) |
| MRSA                                                                 | 2 (2%)   |
| <i>Enterococcus faecium</i>                                          | 3 (3%)   |
| Other                                                                | 13 (14%) |

|                    |          |
|--------------------|----------|
| <i>Candida</i> spp | 7 (8%)   |
| No detection       | 17 (19%) |

ESBL: extended-spectrum beta-lactamase; MSSA: Methicillin-susceptible *Staphylococcus aureus*; MRSA: Methicillin-resistant *Staphylococcus aureus*.

Values are given as absolute numbers (N) and relative incidence (%).

**Table S2.** Observed meropenem concentrations under continuous renal replacement therapy.

Distribution of meropenem concentrations ( $c_{MER}$ ) in critically ill patients with continuous renal replacement therapy (CRRT) and an individualized dosing strategy within 48 h (=  $c_{MER}$  based on software-guided empiric dosing) and after 48 h (=  $c_{MER}$  based on TDM-guided dosing). Values are given in absolute and relative incidence.

| $c_{MER}$ (mg/L)                            | <2       | 2-8       | 8-16      | 16-24     | >24      |
|---------------------------------------------|----------|-----------|-----------|-----------|----------|
| Software-guided empiric dosing ( $n = 11$ ) | 0 (0.0%) | 0 (0.0%)  | 9 (81.8%) | 2 (18.2%) | 0 (0.0%) |
| TDM-guided dosing ( $n = 10$ )              | 0 (0.0%) | 1 (10.0%) | 9 (90.0%) | 0 (0.0%)  | 0 (0.0%) |

$c_{MER}$ : meropenem concentration; TDM: therapeutic drug monitoring

Values are given in absolute number (N) and relative incidence (%).

**Table S3.** Empiric dosing. Distribution of meropenem concentrations ( $c_{MER}$ ) in 91 critically ill patients with a continuous infusion individualized by dosing software CADDy (=  $c_{MER}$  observed based on software-guided empiric dosing) compared to simulated continuous infusion as well as intermittent bolus administration of recommended doses according to the summary of product characteristics (=  $c_{MER}$  predicted based on standard dosing) within 48 h after onset of treatment.

| $c_{MER}$ (mg/L)                           | <2         | 2-8        | 8-16       | 16-24      | >24        |
|--------------------------------------------|------------|------------|------------|------------|------------|
| Predicted based on standard dosing (bolus) | 16 (17.5%) | 26 (28.6%) | 24 (26.4%) | 11 (12.1%) | 14 (15.4%) |
| Predicted based on standard dosing (CI)    | 0 (0.0%)   | 2 (2.2%)   | 44 (48.4%) | 25 (27.5%) | 20 (22.0%) |

|                                              |          |          |            |            |          |
|----------------------------------------------|----------|----------|------------|------------|----------|
| Observed software-guided empiric dosing (CI) | 0 (0.0%) | 6 (6.6%) | 55 (60.4%) | 21 (23.1%) | 9 (9.9%) |
|----------------------------------------------|----------|----------|------------|------------|----------|

C<sub>MER</sub>: meropenem concentration; CI: continuous infusion; TDM: therapeutic drug monitoring

Values are given in absolute number (*N*) and relative incidence (%).

**Table S4.** Standard doses meropenem according to the German summary of product characteristics.

| Creatinine clearance (CrCL) (mL/min) | Daily dose meropenem (mg)* |
|--------------------------------------|----------------------------|
| > 50                                 | 3000                       |
| 26 – 50                              | 2000                       |
| 10 – 25                              | 1000                       |
| < 10                                 | 500                        |

\*according to the German summary of product characteristics (SmPC) of Meronem [44]
